# Supplementary material for: Molecular Correlates of Early Onset of Diabetic Cardiomyopathy: Possible Therapeutic Targets
Source: Hindawi journal article supplement (doi:10.1155/2022/9014155), 2022-01-01
Supplement: f1 [file 9014155.f1.pdf]

**MS ID: 9014155**

**Online Supplement:**

**Molecular correlates of early onset of diabetic cardiomyopathy:  
possible therapeutic targets**

Dongjuan Wang\*<sup>1</sup>, Kun Liu\*<sup>2</sup>, Jinyan Zhong<sup>1</sup>, Xin Li<sup>3</sup>, Jie Zhang<sup>3</sup>, Gongxin Wang<sup>4</sup>, Ni Li<sup>2</sup>,  
Tianwen Li<sup>5</sup>, Harvey Davis<sup>6</sup>, Ibrahim El-gaby<sup>2</sup>, Guoliang Hao<sup>2,4</sup>, Honghua Ye<sup>†1</sup>, Dan Li<sup>†2</sup>

1. Department of Cardiology, HwaMei Hospital, University of Chinese Academy of Sciences, Ningbo, Zhejiang, 315000, China
2. Burdon Sanderson Cardiac Science Centre and BHF Centre of Research Excellence, Department of Physiology, Anatomy and Genetics, University of Oxford, Oxford, OX1 3PT, UK
3. Department of Endocrinology, HwaMei Hospital, University of Chinese Academy of Sciences, Ningbo, Zhejiang, 315000, China
4. Henan SCOPE Research Institute of Electrophysiology Co. Ltd., Kaifeng 475000, China.
5. Ningbo Institute of Life and Health Industry, University of Chinese Academy of Sciences, Ningbo, Zhejiang, 315000, China
6. Department of Neuroscience, Physiology and Pharmacology, University College London, London WC1E 6BT, UK

\* These authors contributed equally to this work

† *Correspondences:*

Dan Li

E-mail: [dan.li@dpag.ox.ac.uk](mailto:dan.li@dpag.ox.ac.uk)

Honghua Ye

E-mail: [lindayenbjch@163.com](mailto:lindayenbjch@163.com)

## Supplementary Methods

**Transmission Electron Microscopy:** Human induced pluripotent stem cell-derived cardiomyocytes (iPSC-CMs) were processed as a monolayer on 12 mm glass coverslips. Samples were fixed with 2.5% glutaraldehyde + 2% PFA in 0.1M PIPES buffer, pH 7.4, pre-warmed to 37°C for 1hr at room temperature and then overnight 4°C. Samples were washed with 0.1M PIPES buffer, post-fixed with 1% OsO<sub>4</sub> +1.5% potassium ferrocyanide in 0.1M PIPES buffer, washed extensively with water and then stained with 0.5% uranyl acetate overnight at 4°C. Samples were then dehydrated using an ethanol series (30%, 50%, 70%, 80%, 90%, 95%) for 10 min at each step, then transferred to 100% ethanol for 60 mins with 3 solution changes. Samples were then infiltrated with TAAB Low Viscosity resin as follows: 25% resin in ethanol for 1 hr, 50% resin in ethanol for 2 hrs, 75% resin in ethanol for 1hr then 100% resin overnight. Samples were then incubated in 100% resin for a further 8 hrs with two fresh changes of resin, then embedded by inverting the coverslip cell side down onto a BEEM capsule tube filled with fresh resin and polymerised at 60°C for 48 hrs. Coverslips were snapped off the polymerised blocks using liquid nitrogen, leaving the cell monolayer embedded on the top surface of the block. Ultrathin sections (90nm) were obtained using a Diatome diamond knife on a Leica EM UC7 ultramicrotome and were transferred to 300 mesh copper grids. Sections were post-stained with lead citrate for 5 mins, washed with water and air dried, then imaged in a FEI Tecnai 12 TEM operated at 120kV using a Gatan OneView camera.

**Supplementary table 1: List of primer sequences used for RT-PCR analysis.**

| Gene       | Primer sequence (5'-3') |                         |
|------------|-------------------------|-------------------------|
|            | Forward                 | Reverse                 |
| ANP        | GCAAACATCAGATCGTGCCC    | GGTGGTCTAGCAGGTTCTTGAAA |
| BNP        | ACAATCCACGATGCAGAAGCTG  | TCTGCCCAAAGCAGCTTGAA    |
| GAPDH      | GCAAGTTCAACGGCACAG      | CGCCAGTAGACTCCACGAC     |
| Hist2h2aa2 | CGGACAATCGGGTGTCTGTC    | CATCACGAGAGCGCAAACAG    |
| Decr1      | TGTGATCGCGAGCAGGAATA    | GCCCTGCAACTTTGATCAGC    |
| Ndufv2     | TGGAGAGACTACGCCTGACA    | TGGGTGTCAGATCCTCGTAG    |
| Ndufa5     | GGAGCAGCTTCTACGTTTCGAT  | CACCAGGCCAGTAGTCTTCTTC  |
| Cox7c      | CTCGTTCCGGATAGCAAGGT    | AACGGCAAATTCTTCCCCG     |
| Calm2      | GAGCGAGTCGAGTGGTTGTC    | AGTCAGTTGGTCAGCCATGC    |
| Ddit3      | ACCTGAGGAGAGAGTGTTC     | GGACACTGTCTCAAAGGCGA    |
| Scp2       | ACGTGAAGAAC GGCAAAGGA   | CCTTGAAAGAAGGCCGACTG    |
| Prkag1     | GTGCTAGCAATGGAGTCGGT    | TCGATTCCGGGGTCTCTTGA    |

**Supplementary table 2: Hub genes from PPI network for the candidate pathways.**

| Gene<br>Symbol | Chromo<br>-some | Strand | Average TPM |         |                | log <sub>2</sub> FC<br>High / Control | Q value | Regulation | KEGG pathway                                             |
|----------------|-----------------|--------|-------------|---------|----------------|---------------------------------------|---------|------------|----------------------------------------------------------|
|                |                 |        | Control     | Low     | High           |                                       |         |            |                                                          |
| Ndufa1         | chrX            | -      | 646.93      | 559.15  | 568.21         | -0.3101                               | 0.0160  | down       | Oxidative phosphorylation                                |
| Ndufa5         | chr4            | -      | 1081.98     | 971.80  | 934.31         | -0.3339                               | 0.0008  | down       | Oxidative phosphorylation                                |
| Ndufa6         | chr7            | -      | 949.12      | 816.20  | 847.06         | -0.2845                               | 0.0013  | down       | Oxidative phosphorylation                                |
| Ndufa8         | chr3            | -      | 664.26      | 577.72  | 608.01         | -0.2492                               | 0.0273  | down       | Oxidative phosphorylation                                |
| Ndufb11        | chrX            | +      | 907.51      | 773.86  | 814.09         | -0.2755                               | 0.0120  | down       | Oxidative phosphorylation                                |
| Ndufb2         | chr4            | +      | 564.21      | 475.21  | 484.49         | -0.3418                               | 0.0468  | down       | Oxidative phosphorylation                                |
| Ndufb3         | chr9            | +      | 729.33      | 603.66  | 634.78         | -0.3224                               | 0.0038  | down       | Oxidative phosphorylation                                |
| Ndufb4         | chr11           | +      | 1624.31     | 1393.59 | 1498.30        | -0.2383                               | 0.0469  | down       | Oxidative phosphorylation                                |
| Ndufc1         | chr2            | -      | 317.38      | 267.58  | 279.25         | -0.3078                               | 0.0058  | down       | Oxidative phosphorylation                                |
| Ndufc2         | chr1            | +      | 493.73      | 420.99  | 440.70         | -0.2819                               | 0.0386  | down       | Oxidative phosphorylation                                |
| Ndufv2         | chr9            | -      | 1411.97     | 1172.10 | 1248.56        | -0.2975                               | <0.0001 | down       | Oxidative phosphorylation                                |
| Ndufv3         | chr20           | +      | 874.49      | 813.05  | 737.96         | -0.3272                               | 0.0392  | down       | Oxidative phosphorylation                                |
| Cox7a2         | chr8            | -      | 2081.70     | 1732.82 | 1890.74        | -0.2601                               | 0.0147  | down       | Cardiac muscle contraction/<br>Oxidative phosphorylation |
| Cox7b          | chrX            | +      | 2974.63     | 2554.19 | 2653.78        | -0.2862                               | 0.0234  | down       | Cardiac muscle contraction/<br>Oxidative phosphorylation |
| Cox7c          | chr2            | -      | 1533.15     | 1265.23 | 1342.19        | -0.3147                               | 0.0161  | down       | Cardiac muscle contraction/<br>Oxidative phosphorylation |
| Cox8a          | chr1            | -      | 405.77      | 525.89  | 540.25         | 0.2923                                | <0.0001 | up         | Cardiac muscle contraction/<br>Oxidative phosphorylation |
| Calm2          | chr6            | -      | 197.90      | 239.12  | 156.31         | -0.4607                               | 0.0029  | down       | Calcium signaling pathway                                |
| Scp2           | chr5            | -      | 313.81      | 255.55  | 278.74         | -0.2939                               | 0.0085  | down       | Fatty acid metabolism                                    |
| Slc2a1         | chr5            | +      | 16.73       | 21.40   | 7.94           | -1.2035                               | 0.0007  | down       | Insulin resistance                                       |
| Tab1           | chr7            | +      | 9.10        | 9.18    |                | 0.3858                                | 0.0311  | up         | Apoptosis and TNF signaling<br>pathway                   |
|                |                 |        |             |         | Substitutions* |                                       |         |            |                                                          |
| Prkag1         | chr7            | -      | 92.01       | 83.36   | 84.95          | -0.2336                               | 0.0431  | down       | Insulin resistance                                       |
| Ddit3          | chr7            | +      | 354.54      | 523.16  | 582.45         | 0.6035                                | 0.0041  | up         | Apoptosis and TNF signaling<br>pathway                   |

\* Considering the low abundance of Slc2a1 and Tab1, the highly enriched Prkag1 and Ddit3 were selected as candidates to ensure the presence of plausible hub genes in the Insulin resistance pathway and Apoptosis and TNF signalling pathway.

**Figure S1**

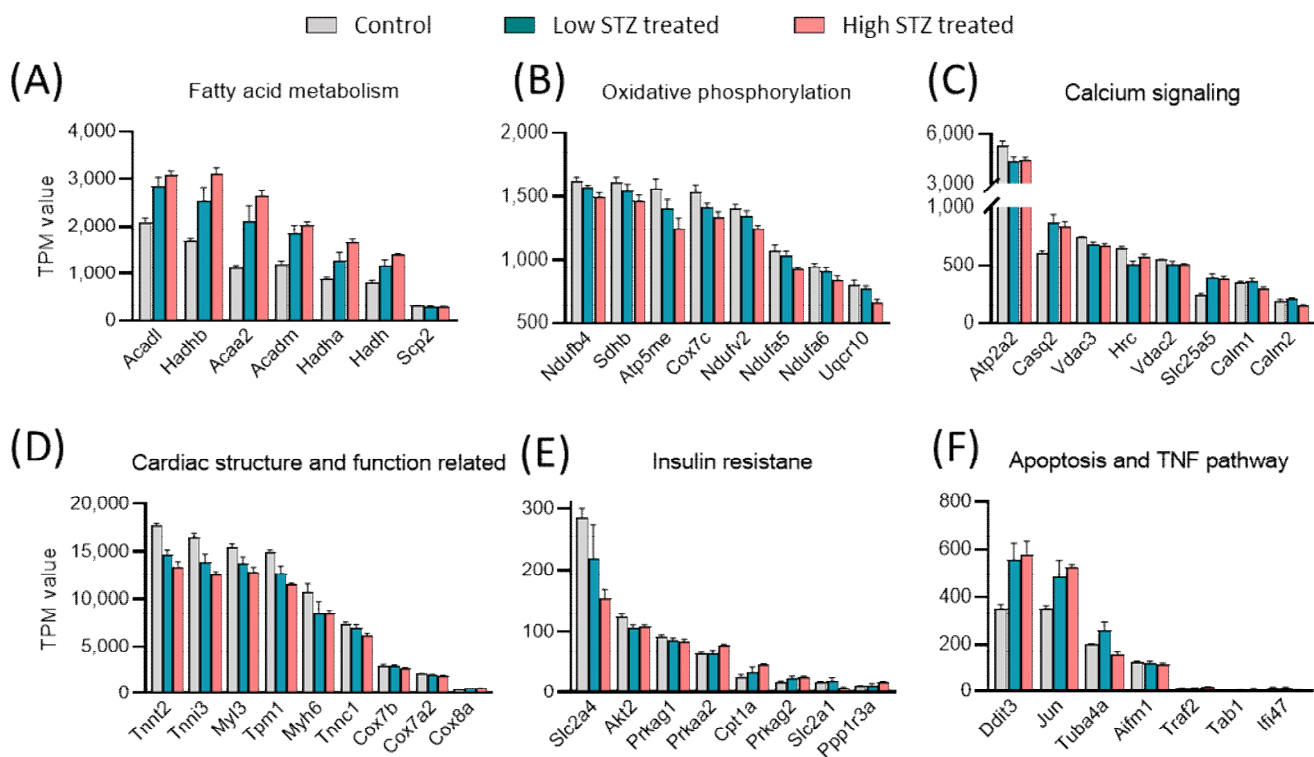

**Figure S1:** Bar graph to compare the TPM (transcript per million) values of key genes from RNA-Seq analysis according to the KEGG pathway classification. List of DEGs selected from the comparison of Control vs High STZ treated group, which related to fatty acid metabolism (A), oxidative phosphorylation (B), calcium signalling (C), cardiac structure and function related (D), Insulin resistance (E) and apoptosis and TNF pathway (F).

Figure S2

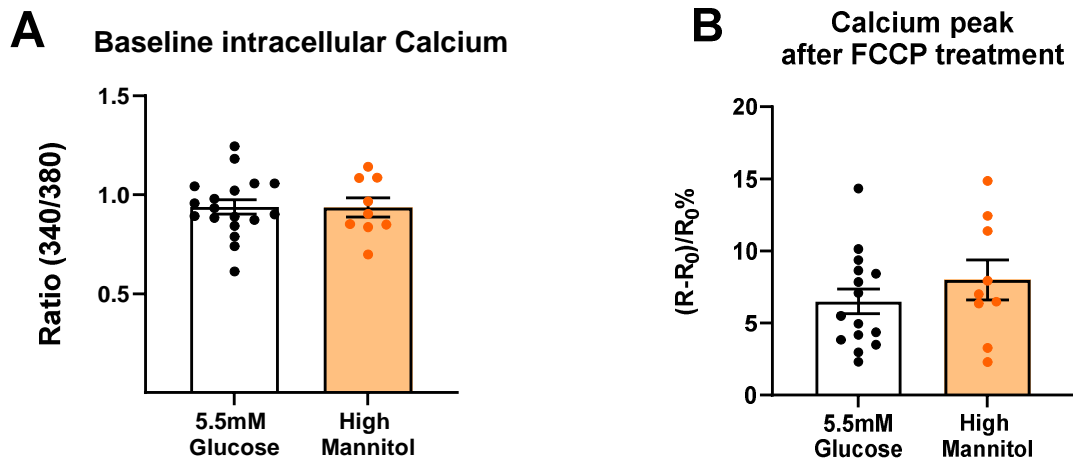

**Figure S2:** Intracellular free calcium concentration on the baseline (**A**) and after treatment with 3  $\mu\text{mol/L}$  FCCP (**B**) in hiPSC-CMs exposed to 5.5 mmol/L Glucose or high Mannitol (5.5 mmol/L glucose with 19.5 mmol/L Mannitol) media.

Figure S3

**A. 5.5mmol/L Glucose**

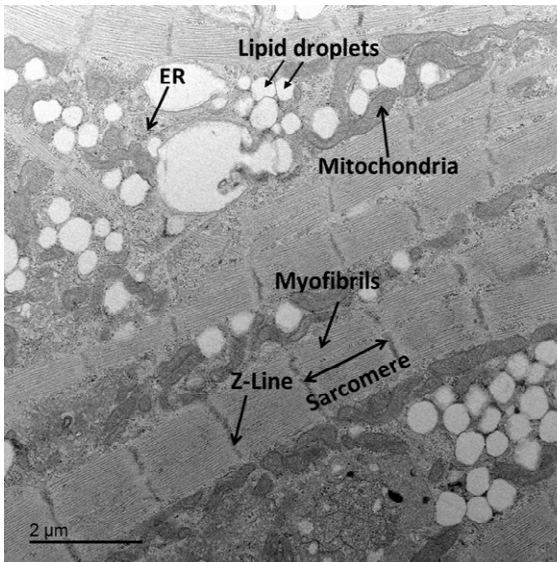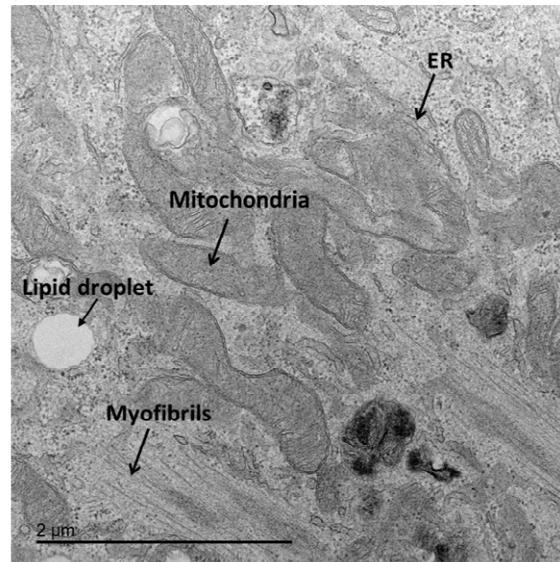

**B. 25mmol/L Glucose**

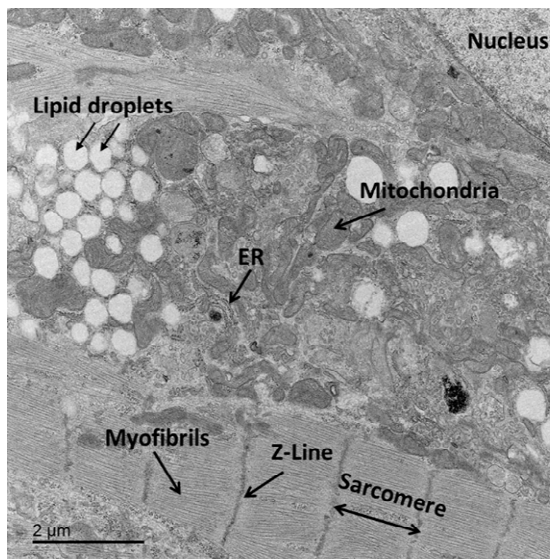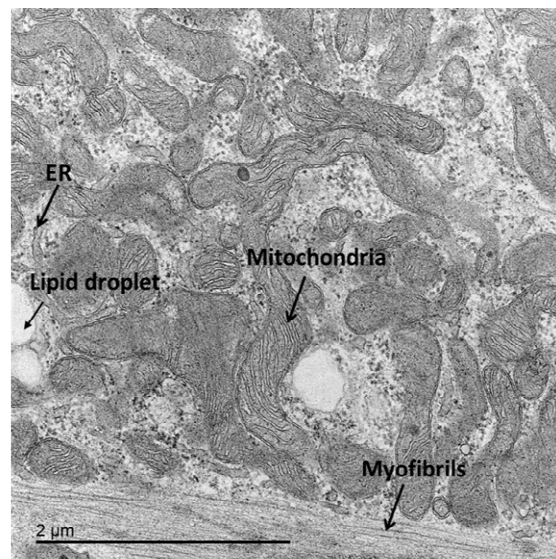

**Figure S3:** Transmission electron microscopy (TEM) of human induced pluripotent stem cell-derived cardiomyocytes (iPSC-CMs) treated in 5.5 (A) and 25 mmol/L glucose (B) culture media. ER: Endoplasmic reticulum. Scale bar: 2 μm.
